# Supplementary material for: Associations between State-Level Obesity Rates, Engagement with Food Brands on Social Media, and Hashtag Usage
Source: MDPI journal article supplement (doi:10.3390/ijerph182312785), 2021-12-03
Supplement: s1 [file s1]

**Table S1.** Results of regression analysis for relationship between the number of followers of popular and beverage brands (n = 26) and obesity rates by state in USA

|           | Predictors        | Estimate    | SE    | p      | F                    | R <sup>2</sup> |
|-----------|-------------------|-------------|-------|--------|----------------------|----------------|
| Instagram | (Intercept)       | 31.397 ***  | 0.671 | < .001 | F (2, 48)<br>= 1.679 | 0.065          |
|           | Any               | - 0.721     | 0.422 | .09    |                      |                |
|           | Low-Calorie Drink | 0.572       | 0.458 | .22    |                      |                |
|           | (Intercept)       | 30.507 ***  | 0.745 | < .001 | F (2, 48)<br>= 4.524 | 0.159          |
|           | Any               | - 2.583 **  | 0.897 | .006   |                      |                |
|           | Sugary Drink      | 2.625 *     | 0.988 | .01    |                      |                |
|           | (Intercept)       | 30.431 ***  | 0.696 | < .001 | F (2, 48)<br>= 6.310 | 0.208          |
|           | Any               | - 1.894 *** | 0.536 | < .001 |                      |                |
|           | Fast Food         | 2.073 **    | 0.640 | .002   |                      |                |
| Twitter   | (Intercept)       | 30.563 ***  | 0.723 | < .001 | F (2, 48)<br>= 4.653 | 0.162          |
|           | Any               | - 1.680 **  | 0.556 | .004   |                      |                |
|           | Low-Calorie Drink | 1.753 **    | 0.644 | .009   |                      |                |
|           | (Intercept)       | 30.475 ***  | 0.777 | < .001 | F (2, 48)<br>= 3.983 | 0.142          |
|           | Any               | - 1.553 **  | 0.558 | .008   |                      |                |
|           | Sugary Drink      | 1.694 *     | 0.686 | .02    |                      |                |
|           | (Intercept)       | 30.521 ***  | 0.693 | < .001 | F (2, 48)<br>= 5.766 | 0.194          |
|           | Any               | - 1.219 **  | 0.361 | .001   |                      |                |
|           | Fast Food         | 1.396 **    | 0.452 | .003   |                      |                |

**Note.** Any = Users who followed any account on Instagram or Twitter. SE = Standard Error. \*\*\*  $p < .001$ , \*\*  $p < .01$ , \*  $p < .05$  for two-tailed tests.

**Table S2:** Results of ANCOVA for differences in the mean number of followers among hashtags (healthy or unhealthy) or brands (low calorie drink, sugary drink, or fast food).

| Instagram         |     |                        |          |            | Twitter         |     |                       |          |            |
|-------------------|-----|------------------------|----------|------------|-----------------|-----|-----------------------|----------|------------|
| Factor            |     | $F$                    | $p$      | $\eta_G^2$ | Factor          |     | $F$                   | $p$      | $\eta_G^2$ |
| Any               | *** | $F(1, 383) = 2334.538$ | $< .001$ | 0.859      | Any             | *** | $F(1, 197) = 225.195$ | $< .001$ | 0.533      |
| Hashtags          | **  | $F(1, 383) = 9.379$    | .002     | 0.024      | Hashtag         |     | $F(1, 197) = 2.198$   | .14      | 0.011      |
| Brands            | *** | $F(2, 383) = 33.537$   | $< .001$ | 0.149      | Brand           | *** | $F(2, 197) = 25.916$  | $< .001$ | 0.208      |
| Hashtags x Brands | *** | $F(2, 383) = 7.383$    | $< .001$ | 0.037      | Hashtag x Brand | *   | $F(2, 197) = 4.740$   | .01      | 0.046      |

**Note.** Any = Users who followed any account on Instagram or Twitter. \*\*\*  $p < .001$ , \*\*  $p < .01$ , \*  $p < .05$  for two-tailed tests.

**Table S3:** Results of simple main effect analysis for hashtags

| Brand             | Instagram |     |                     |          |            | Twitter  |     |                    |          |            |
|-------------------|-----------|-----|---------------------|----------|------------|----------|-----|--------------------|----------|------------|
|                   | Factor    |     | $F$                 | $p$      | $\eta_G^2$ | Factor   |     | $F$                | $p$      | $\eta_G^2$ |
| Low-Calorie Drink | Any       | *** | $F(1, 127) = 1352$  | $< .001$ | 0.914      | Any      | *** | $F(1, 65) = 182$   | $< .001$ | 0.737      |
|                   | Hashtags  |     | $F(1, 127) = 3.83$  | .16      | 0.029      | Hashtags |     | $F(1, 65) = 3.46$  | .20      | 0.050      |
| Sugary Drink      | Any       | *** | $F(1, 127) = 458$   | $< .001$ | 0.783      | Any      | *** | $F(1, 65) = 214$   | $< .001$ | 0.767      |
|                   | Hashtags  |     | $F(1, 127) = 0.853$ | 1.00     | 0.007      | Hashtags |     | $F(1, 65) = 0.668$ | 1.00     | 0.010      |
| Fast Food         | Any       | *** | $F(1, 127) = 1168$  | $< .001$ | 0.902      | Any      | *** | $F(1, 65) = 97.4$  | $< .001$ | 0.600      |
|                   | Hashtags  | *** | $F(1, 127) = 32.2$  | $< .001$ | 0.202      | Hashtags |     | $F(1, 65) = 0.012$ | 1.00     | 0.000177   |

**Note.** Any = Users who followed any account on Instagram or Twitter. \*\*\*  $p < .001$  for two-tailed tests. All  $p$ -values are corrected with the Bonferroni method.

**Table S4:** Results of simple main effect analysis for brands

| Hashtag   | Instagram |     |                    |          |            | Twitter |     |                    |          |            |
|-----------|-----------|-----|--------------------|----------|------------|---------|-----|--------------------|----------|------------|
|           | Factor    |     | $F$                | $p$      | $\eta_G^2$ | Factor  |     | $F$                | $p$      | $\eta_G^2$ |
| Healthy   | Any       | *** | $F(1, 233) = 891$  | $< .001$ | 0.793      | Any     | *** | $F(1, 167) = 191$  | $< .001$ | 0.534      |
|           | Brands    | *** | $F(2, 233) = 17.2$ | $< .001$ | 0.129      | Brands  | *** | $F(2, 167) = 26.2$ | $< .001$ | 0.238      |
| Unhealthy | Any       | *** | $F(1, 149) = 2074$ | $< .001$ | 0.933      | Any     | *** | $F(1, 29) = 22.5$  | $< .001$ | 0.437      |
|           | Brands    | *** | $F(2, 149) = 32.9$ | $< .001$ | 0.307      | Brands  |     | $F(2, 29) = 0.113$ | 1.00     | 0.008      |

**Note.** Any = Users who followed any account on Instagram or Twitter. \*\*\*  $p < .001$  for two-tailed tests. All  $p$ -values are corrected with the Bonferroni method.

**Table S5:** Results of pairwise comparison between hashtags (healthy and unhealthy) at each brand

| Brand             | Instagram   |           |          | Twitter   |           |          |
|-------------------|-------------|-----------|----------|-----------|-----------|----------|
|                   | Estimate    | <i>SE</i> | <i>p</i> | Estimate  | <i>SE</i> | <i>p</i> |
| Low-Calorie Drink | - 0.0714    | 0.0438    | .10      | 0.252 *** | 0.0751    | < .001   |
| Sugary Drink      | 0.0384      | 0.0438    | .38      | - 0.0126  | 0.0751    | .87      |
| Fast Food         | - 0.199 *** | 0.0438    | < .001   | - 0.0450  | 0.0751    | .55      |

**Note.** The results on grey background are computed for significant simple main effect of Hashtag. Estimate = Estimated difference between the two estimated marginal means. *SE* = Standard Error. \*\*\*  $p < .001$  for two-tailed tests. All *p*-values are corrected with the Bonferroni method.

**Table S6:** Results of pairwise comparison between brands (low calorie drink, sugary drink, and fast food) at each hashtag

| Hashtag   | Brand Comparison                  | Instagram   |           |          | Twitter   |           |          |
|-----------|-----------------------------------|-------------|-----------|----------|-----------|-----------|----------|
|           |                                   | Estimate    | <i>SE</i> | <i>p</i> | Estimate  | <i>SE</i> | <i>p</i> |
| Healthy   | Low-Calorie Drink vs Sugary Drink | 0.193 ***   | 0.0388    | < .001   | 0.274 *** | 0.0426    | < .001   |
|           | Low-Calorie Drink vs Fast Food    | 0.231 ***   | 0.0388    | < .001   | 0.302 *** | 0.0426    | < .001   |
|           | Sugary Drink vs Fast Food         | 0.0378      | 0.0388    | .99      | 0.0279    | 0.0426    | 1.00     |
| Unhealthy | Low-Calorie Drink vs Sugary Drink | 0.303 ***   | 0.0482    | < .001   | 0.00909   | 0.0969    | 1.00     |
|           | Low-Calorie Drink vs Fast Food    | 0.104       | 0.0482    | .10      | 0.00455   | 0.0969    | 1.00     |
|           | Sugary Drink vs Fast Food         | - 0.200 *** | 0.0482    | < .001   | - 0.00455 | 0.0969    | 1.00     |

**Note.** The results on grey background are computed for significant simple main effect of brands. Estimate = Estimated difference between the two estimated marginal means. *SE* = Standard Error. \*\*\*  $p < .001$  for two-tailed tests. All *p*-values are corrected with the Bonferroni method.
